# Supplementary material
Source: publisher site journal article supplement (https://www.spandidos-publications.com/5471/downloadSupplementary)
Supplement: Supplementary file 1 [file downloadSupplementary]

Table SI. GCS.

| Group | Severity | GCS   |
|-------|----------|-------|
| 1     | Mild     | 13-15 |
| 2     | Moderate | 9-12  |
| 3     | Severe   | < 9   |

The GCS receives values between 3 and 15, with the literature associating higher scores with a better prognosis (1). According to the admission GCS, three categories were used to classify injury severity (2,3). During statistical analysis, GCS scores were binarized as follows: Mild and moderate (GCS 9-15) and severe (GCS <9). GCS, Glasgow Coma Scale.

Table SII. Summary of studies on IL-6 in animals with TBI.

| Significance       | Increased levels after TBI or higher than controls                                                                                                                                                                                                                                                                                                                                                                | Increased after weight drop                                                                                                                                                        | Increased after controlled cortical impact                                                                                                       | Increased after fluid percussion injury     | Increase after blast injury       | Histological findings                                                   | Outcome                                                                                                  |
|--------------------|-------------------------------------------------------------------------------------------------------------------------------------------------------------------------------------------------------------------------------------------------------------------------------------------------------------------------------------------------------------------------------------------------------------------|------------------------------------------------------------------------------------------------------------------------------------------------------------------------------------|--------------------------------------------------------------------------------------------------------------------------------------------------|---------------------------------------------|-----------------------------------|-------------------------------------------------------------------------|----------------------------------------------------------------------------------------------------------|
| Significant effect | <p>Yang <i>et al</i>, 2013 (4)</p> <p>Chatzipanteli <i>et al</i>, 2012 (5)</p> <p>Holmin <i>et al</i>, 1997 (6)</p> <p>Rhodes <i>et al</i>, 2002 (7)</p> <p>Stover <i>et al</i>, 2003 (8)</p> <p>Stover <i>et al</i>, 2000 (9)</p> <p>Gao <i>et al</i>, 2017 (10)</p> <p>Li <i>et al</i>, 2019 (11)</p> <p>Bai <i>et al</i>, 2017 (12)</p> <p>Jia <i>et al</i>, 2012 (13)</p> <p>Yang <i>et al</i>, 2013 (14)</p> | <p>Yang <i>et al</i>, 2013 (4)</p> <p>Holmin <i>et al</i>, 1997 (6)</p> <p>Rhodes <i>et al</i>, 2002 (7)</p> <p>Bai <i>et al</i>, 2017 (12)</p> <p>Jia <i>et al</i>, 2012 (13)</p> | <p>Stover <i>et al</i>, 2003 (8)</p> <p>Stover <i>et al</i>, 2000 (9)</p> <p>Gao <i>et al</i>, 2017 (10)</p> <p>Yang <i>et al</i>, 2013 (14)</p> | <p>Chatzipanteli <i>et al</i>, 2012 (5)</p> | <p>Li <i>et al</i>, 2019 (11)</p> | <p>Li <i>et al</i>, 2019 (11)</p> <p>Swartz <i>et al</i>, 2001 (15)</p> | <p>Yang <i>et al</i>, 2013 (4)</p> <p>Ley <i>et al</i>, 2011 (16)</p> <p>Ley <i>et al</i>, 2012 (17)</p> |

No statistical  
significance

Stahel *et al*, 2000  
(18)

Stahel *et al*, 2000  
(18)  
Marklund *et al*,  
2005 (19)

Notes

IL-6 levels in  
plasma and  
cerebrospinal  
fluid or  
expression of IL-  
6 in cell cultures.

BBB  
disturbances  
(Stahel *et al*,  
2000) (18), PMN  
accumulation  
(Stahel *et al*,  
2000) (18), tissue  
repair (Swartz *et  
al*, 2001) (15),  
neurodegeneratio  
n (Li *et al*, 2019)  
(11)

Outcome was  
assessed by  
mortality and  
performance on  
cognitive tests

---

Table SIII. Summary of studies on IL-6 in human TBI populations.

| Significance          | Increased in<br>TBI vs control              | GCS on<br>admission                | ICP                                       | BBB<br>disturbances               | Radiology<br>findings               | Complications                            | Other<br>biomarkers                 | Outcome                                   |
|-----------------------|---------------------------------------------|------------------------------------|-------------------------------------------|-----------------------------------|-------------------------------------|------------------------------------------|-------------------------------------|-------------------------------------------|
| Significant<br>effect | Rodney <i>et al</i> ,<br>2020 (20)          | Yang <i>et al</i> ,<br>2017 (36)   | Hergenroeder<br><i>et al</i> , 2010       | Vajtr <i>et al</i> ,<br>2009 (43) | Vajtr <i>et al</i> ,<br>2009 (43)   | Lustenberger <i>et al</i> ,<br>2016 (37) | Kossmann <i>et al</i> , 1996 (22)   | Chiaretti <i>et al</i> ,<br>2005 (41)     |
|                       | Bell <i>et al</i> ,<br>1997 (21)            | He <i>et al</i> , 2009<br>(40)     | (27)<br>Shore <i>et al</i> ,<br>2004 (42) |                                   | Mellergård <i>et al</i> , 2011 (44) | Aisiku <i>et al</i> , 2016<br>(47)       | Pleines <i>et al</i> ,<br>2001 (45) | Chiaretti <i>et al</i> ,<br>2008 (51)     |
|                       | Kossmann <i>et al</i> , 1996 (22)           | Chiaretti <i>et al</i> , 2005 (41) |                                           |                                   | Pleines <i>et al</i> ,<br>2001 (45) | Lenski <i>et al</i> , 2019<br>(48)       |                                     | Aisiku <i>et al</i> ,<br>2016 (47)        |
|                       | Ondruschka <i>et al</i> , 2018 (23)         |                                    |                                           |                                   | Singhal <i>et al</i> ,<br>2002 (46) | Choudhary <i>et al</i> ,<br>2021 (49)    |                                     | Woiciechowsky<br><i>et al</i> , 2002 (50) |
|                       | Thompson <i>et al</i> , 2020 (24)           |                                    |                                           |                                   |                                     | Woiciechowsky <i>et al</i> , 2002(50)    |                                     | Davidson <i>et al</i> ,<br>2015 (52)      |
|                       | Bell <i>et al</i> ,<br>1997 (25)            |                                    |                                           |                                   |                                     |                                          |                                     | Peltz <i>et al</i> ,<br>2020 (53)         |
|                       | Liao <i>et al</i> ,<br>2013 (26)            |                                    |                                           |                                   |                                     |                                          |                                     | Winter <i>et al</i> ,<br>2004 (54)        |
|                       | Hergenroeder<br><i>et al</i> , 2010<br>(27) |                                    |                                           |                                   |                                     |                                          |                                     | Nwachuku <i>et al</i> , 2016 (55)         |
|                       | Terrell <i>et al</i> ,<br>2018 (28)         |                                    |                                           |                                   |                                     |                                          |                                     | Feng <i>et al</i> ,<br>2018 (56)          |
|                       | Me <i>et al</i> , 2022<br>(29)              |                                    |                                           |                                   |                                     |                                          |                                     | Ferreira <i>et al</i> ,<br>2014 (57)      |
|                       | Gill <i>et al</i> ,<br>2017 (30)            |                                    |                                           |                                   |                                     |                                          |                                     | Lewis <i>et al</i> ,<br>2019 (58)         |
|                       | Hayakata <i>et al</i> , 2004 (31)           |                                    |                                           |                                   |                                     |                                          |                                     | Kumar <i>et al</i> ,<br>2015 (59)         |
|                       | Ravi <i>et al</i> ,<br>2022 (32)            |                                    |                                           |                                   |                                     |                                          |                                     | Raheja <i>et al</i> ,<br>2016 (60)        |
|                       | Meier <i>et al</i> ,<br>2022 (33)           |                                    |                                           |                                   |                                     |                                          |                                     | Zwirner <i>et al</i> ,<br>2021 (61)       |
|                       | Edwards <i>et al</i> ,<br>2020 (34)         |                                    |                                           |                                   |                                     |                                          |                                     |                                           |
|                       | Berger <i>et al</i> ,<br>2009 (35)          |                                    |                                           |                                   |                                     |                                          |                                     |                                           |
|                       | Yang <i>et al</i> ,<br>2017 (36)            |                                    |                                           |                                   |                                     |                                          |                                     |                                           |

|                                |                                                                                                                        |                                                                                                      |                                                                                                                                                                                |                                                                                                                                                                                                                        |                                                                                                                                                                                                                                                                                                                                     |                                                                                                  |                                                                                                           |
|--------------------------------|------------------------------------------------------------------------------------------------------------------------|------------------------------------------------------------------------------------------------------|--------------------------------------------------------------------------------------------------------------------------------------------------------------------------------|------------------------------------------------------------------------------------------------------------------------------------------------------------------------------------------------------------------------|-------------------------------------------------------------------------------------------------------------------------------------------------------------------------------------------------------------------------------------------------------------------------------------------------------------------------------------|--------------------------------------------------------------------------------------------------|-----------------------------------------------------------------------------------------------------------|
|                                | Lustenberger<br><i>et al</i> , 2016<br>(37)<br>Meier <i>et al</i> ,<br>2020 (38)<br>McKeating <i>et al</i> , 1997 (39) |                                                                                                      |                                                                                                                                                                                |                                                                                                                                                                                                                        |                                                                                                                                                                                                                                                                                                                                     |                                                                                                  |                                                                                                           |
| No statistical<br>significance | Edwards <i>et al</i> ,<br>2020(34)<br>Di Battista <i>et al</i> , 2020(62)                                              | Hayakata <i>et al</i> , 2004(31)<br>Park and Hwang,<br>2018(63)<br>Chiaretti <i>et al</i> , 2008(51) | Hergenroeder<br><i>et al</i> , 2010(27)<br>Hayakata <i>et al</i> , 2004(31)                                                                                                    | Maier <i>et al</i> ,<br>2001(64)                                                                                                                                                                                       |                                                                                                                                                                                                                                                                                                                                     |                                                                                                  | Hayakata <i>et al</i> ,<br>2004(31)<br>Park and Hwang,<br>2018(63)<br>Crichton <i>et al</i> ,<br>2021(65) |
| Notes                          |                                                                                                                        |                                                                                                      | Association<br>between IL-6<br>and ICP in<br>patients with<br>isolated TBI<br>but not in<br>polytrauma<br>patients with<br>TBI<br>(Hergenroeder<br><i>et al</i> ,<br>2010)(27) | Expansion of<br>lesions (Vajtr<br><i>et al</i> ,<br>2009)(43)<br>(Pleines <i>et al</i> ,<br>2001)(45)<br>(Singhal <i>et al</i> ,<br>2002)(46) ,<br>subarachnoid<br>haemorrhage<br>(Møllergård <i>et al</i> , 2011)(44) | ARDS (Aisiku <i>et al</i> , 2016)(47),<br>Infection<br>(Woiciechowsky <i>et al</i> , 2002)(50),<br>Ventriculitis(Lenski<br><i>et al</i> , 2019)(48),<br>Epilepsy<br>(Choudhary <i>et al</i> ,<br>2021)(49), Sepsis<br>(Lustenberger <i>et al</i> ,<br>2016)(37),<br>Multiorgan Failure<br>(Lustenberger <i>et al</i> ,<br>2016)(37) | NGF<br>(Kossmann <i>et al</i> , 1996)(22),<br>S100B, NSE<br>(Pleines <i>et al</i> ,<br>2001)(45) | Outcome<br>assessed by<br>mortality, GOS,<br>GOS – E                                                      |

---

Table SIV. Studies on IL-8 in human populations suffering from TBI.

| Significance                | Concentration differences in TBI vs control                                                         | GCS on admission                                                  | ICP                                   | BBB disturbances                 | Radiology findings                                                 | Complications                  | Other biomarkers                 | Outcome                                                                                                                                                                                                                                          |
|-----------------------------|-----------------------------------------------------------------------------------------------------|-------------------------------------------------------------------|---------------------------------------|----------------------------------|--------------------------------------------------------------------|--------------------------------|----------------------------------|--------------------------------------------------------------------------------------------------------------------------------------------------------------------------------------------------------------------------------------------------|
| Significant effect          | Rowland <i>et al</i> , 2020(66)<br>Chaban <i>et al</i> , 2020(67)<br>Whalen <i>et al</i> , 2000(68) | He <i>et al</i> , 2009(40)                                        | Stein <i>et al</i> , 2012(69)         | Kossmann <i>et al</i> , 1997(70) | Chaban <i>et al</i> , 2020(67)                                     | Aisiku <i>et al</i> , 2016(47) | Kossmann <i>et al</i> , 1997(70) | Mussack <i>et al</i> , 2002(71)<br>Gopcevic <i>et al</i> , 2007(72)<br>Crichton <i>et al</i> , 2021(65)<br>Ferreira <i>et al</i> , 2014(57)<br>Yang <i>et al</i> , 2022(73)<br>Nwachuku <i>et al</i> , 2016(55)<br>Kushi <i>et al</i> , 2003(74) |
| No statistical significance | Mussack <i>et al</i> , 2002(71)                                                                     | Polat <i>et al</i> , 2019(75)<br>Hayakata <i>et al</i> , 2004(31) | Perez-Barcena <i>et al</i> , 2011(76) | Maier <i>et al</i> , 2001(64)    | Hayakata <i>et al</i> , 2004(31)<br>Rhodes <i>et al</i> , 2009(77) |                                | Hayakata <i>et al</i> , 2004(31) | Hayakata <i>et al</i> , 2004(31)<br>Gopcevic <i>et al</i> , 2007(72)                                                                                                                                                                             |

Notes

Size of lesions      ARDS

S100B  
(Hayakata *et al*, 2004)(31),  
NGF  
(Kossmann *et al*, 1997)(70),  
(Hayakata *et al*, 2004)(31)  
  
Outcome  
assessed by  
mortality,  
GOS, GOS -E  
One study  
found  
association  
between  
plasma IL-8  
levels with the  
outcome but  
no association  
between CSF  
IL-8 levels  
with the  
outcome  
(Gopcevic *et al*, 2007)(72)

---

Table SV. Studies on IL-10 in animals with provoked TBI.

| Significance                | Concentration increases after TBI or concentration difference with controls                                                              | Concentration increases after weight drop | Concentration increases after controlled cortical impact | Concentration increases after fluid percussion injury | Concentration increases after blast injury | Histological findings             | Outcome                                                                                        |
|-----------------------------|------------------------------------------------------------------------------------------------------------------------------------------|-------------------------------------------|----------------------------------------------------------|-------------------------------------------------------|--------------------------------------------|-----------------------------------|------------------------------------------------------------------------------------------------|
| Statistical Significance    | Kamm <i>et al</i> , 2006(78)                                                                                                             | Kamm <i>et al</i> , 2006(78)              |                                                          |                                                       |                                            | Peruzzaro <i>et al</i> , 2019(79) | Maiti <i>et al</i> , 2019(80)<br>Zhou <i>et al</i> , 2014(81)<br>Knoblauch and Faden, 1998(82) |
| No Statistical Significance | Kamm <i>et al</i> , 2006(78)<br>Maegerle <i>et al</i> , 2007(83)                                                                         | Kamm <i>et al</i> , 2006(78)              |                                                          | Maegerle <i>et al</i> , 2007(83)                      |                                            |                                   |                                                                                                |
| Notes                       | One study found statistically significant increase of IL-10 in the brain parenchyma but not in the plasma (Kamm <i>et al</i> , 2006)(78) |                                           |                                                          |                                                       |                                            | Undamaged tissue                  | Outcome was assessed by mortality and performance on cognitive tests                           |

Table SVI. Research on IL-10 studied in humans suffering from TBI.

| Significance                | Concentration differences in TBI vs control                                                                                                | GCS on admission | ICP                                                                     | BBB disturbances              | Radiology findings                                                                                                                                                           | Complications | Other biomarkers | Outcome                                                                                                                                                                                                                                                                                       |
|-----------------------------|--------------------------------------------------------------------------------------------------------------------------------------------|------------------|-------------------------------------------------------------------------|-------------------------------|------------------------------------------------------------------------------------------------------------------------------------------------------------------------------|---------------|------------------|-----------------------------------------------------------------------------------------------------------------------------------------------------------------------------------------------------------------------------------------------------------------------------------------------|
| Statistical Significance    | Lagerstedt <i>et al</i> , 2018(84)<br>Csuka <i>et al</i> , 1999(85)<br>Lagerstedt <i>et al.</i> , 2018(86)<br>Bell <i>et al</i> , 1997(21) |                  | Shiozaki <i>et al</i> , 2005(87)                                        |                               | Lagerstedt <i>et al</i> , 2018(86)<br>Shiozaki <i>et al</i> , 2005(87)                                                                                                       |               |                  | Bell <i>et al</i> , 1997(21)<br>Lagerstedt <i>et al</i> , 2020(88)<br>Posti <i>et al</i> , 2020(89)<br>Ferreira <i>et al</i> , 2014(57)<br>Vedantam <i>et al</i> , 2021(90)<br>Lewis <i>et al</i> , 2019(58)<br>Schneider Soares <i>et al</i> , 2012(91)<br>Kirchhoff <i>et al</i> , 2008(92) |
| No statistical significance | Koivikko <i>et al</i> , 2022(93)                                                                                                           |                  | Perez-Barcena <i>et al</i> , 2011(76)<br>Müller <i>et al</i> , 2001(94) | Csuka <i>et al</i> , 1999(85) | Perez-Barcena <i>et al</i> , 2011(76)                                                                                                                                        |               |                  |                                                                                                                                                                                                                                                                                               |
| Notes                       |                                                                                                                                            |                  |                                                                         |                               | Increased in patients with visible lesions in CT (Lagerstedt <i>et al</i> , 2018)(86) and in patients with additional extracranial lesions(Shiozaki <i>et al</i> , 2005)(87) |               |                  | Outcome assessed by mortality, GOS, GOS - E                                                                                                                                                                                                                                                   |

Table SVII. mGCS.

| Group | Severity          | mGCS |
|-------|-------------------|------|
| 1     | Mild and Moderate | 4-6  |
| 2     | Severe            | <4   |

The mGCS receives values between 1-6, with the literature associating higher scores with an improved prognosis (1). During statistical analysis, mGCS scores were binarized as follows: Mild and moderate (GCS 4-6) and severe (GCS <4). mGCS, motor Component of Glasgow Coma Scale.

Table SVIII. Karnofsky Performance Scale.

| Severity      | Component                                                                                                                                                                                                         |
|---------------|-------------------------------------------------------------------------------------------------------------------------------------------------------------------------------------------------------------------|
| Mild/Moderate | Capable of performing daily tasks and working without the need for special care (80-100) or Unable to work but capable of taking care of the majority of their personal needs while living independently (50-70). |
| Severe        | Unable to look for themselves requiring constant care (0-40).                                                                                                                                                     |

The Karnofsky Performance Scale was developed in the 1940s to rate quality of life in patients undergoing chemotherapy (95). Currently, it is used as a broad scale to evaluate the patient's functional status on a scale of 0 (poor) to 100 (good) (95). In the present study the KPS was used as a grading scale for the patient's functional status, irrespective of the criteria for hospital admission. Accordingly, it was assessed in all hospitalized patients on the first and seventh post-traumatic days. During statistical analysis, KPS scores were binarised as follows: Mild and Moderate (KPS 50-100) and severe (KPS 0-40).

Table SIX. MRS.

| Group | Severity    | MRS |
|-------|-------------|-----|
| 1     | Favorable   | 0-3 |
| 2     | Unfavorable | 4-6 |

The MRS was established to assess the functional status of stroke victims (96). John Rankin designed its first version in 1957, and scientists from the UK-TIA study and Charles Warlow improved it in 1980 (96). It rates patients on a scale of 0 to 6 (dead) depending on their functional status. During statistical analysis, MRS scores were binarized as follows: Favorable (0-3), and unfavorable (4-6). MRS, Modified Rankin Scale.

Table SX. ECOG/WHO score.

| Group | Severity    | ECOG/WHO |
|-------|-------------|----------|
| 1     | Favorable   | 0-2      |
| 2     | Unfavorable | 3-5      |

The ECOG/WHO score, which was introduced in the study by Oken *et al* (1982) (97) was utilized to evaluate oncology patients functional status on a scale of 0 to 5 (dead) depending on their functional state. In the present study ECOG/WHO scores were binarized as follows: Favorable (0-2),Unfavorable (3-5). ECOG/WHO, Eastern Cooperative Oncology Group/World Health Organisation.

Table SXI. ISS.

| Group | Severity               | ISS  |
|-------|------------------------|------|
| 1     | Mild, Moderate, Severe | 1-24 |
| 2     | Very Severe            | >24  |

The ISS is a complex grading tool for the severity of trauma patient injuries (98). It uses the Abbreviated Injury Scale, which measures the extent of trauma per body location. The three body parts that have sustained the most damage are used to calculate the ISS (99). According to the admission ISS, the following categories were used to classify systematic injury severity: Mild, Moderate and Severe (1-24), or very severe (>24). ISS, Injury Severity Score.

Table SXII. Compression of basal cisterns on the head CT.

| Group                                                                                                                                                                                                                                                                                      | Basal Cisterns                |
|--------------------------------------------------------------------------------------------------------------------------------------------------------------------------------------------------------------------------------------------------------------------------------------------|-------------------------------|
| 1                                                                                                                                                                                                                                                                                          | Normal                        |
| 2                                                                                                                                                                                                                                                                                          | Partially or fully compressed |
| Basal cisterns are part of the perimesencephalic cisterns and they typically appear patent. In cases of high intracranial pressure, they may be compressed (100). The following categories were used to classify the compression of basal cisterns: Normal, Partially or fully compressed. |                               |
|                                                                                                                                                                                                                                                                                            |                               |

Table SXIII. Midline shift on head CT scan.

| Group                                                                                                                                                                                                                                          | Midline Shift (mm) |
|------------------------------------------------------------------------------------------------------------------------------------------------------------------------------------------------------------------------------------------------|--------------------|
| 1                                                                                                                                                                                                                                              | $\leq 5$           |
| 2                                                                                                                                                                                                                                              | $> 5$              |
| The displacement of midline structures is evaluated on the head CT as an index of subfalcine herniation and a predictor of outcome (100). The following categories were used to classify the presence of midline shift: $\leq 5$ mm, $> 5$ mm. |                    |

Table SXIV. Volume of hemorrhagic lesions.

| Group                                                                                                                    | Volume             |
|--------------------------------------------------------------------------------------------------------------------------|--------------------|
| 1                                                                                                                        | $\leq 25\text{cc}$ |
| 2                                                                                                                        | $> 25\text{cc}$    |
| The following categories were used to classify the volume of hemorrhagic lesions: $\leq 25\text{cc}$ , $> 25\text{cc}$ . |                    |

Table SXV. Imaging CT tools.

| Tools                      | Description                                                                                                                                                                                                                                                                                                                                      |
|----------------------------|--------------------------------------------------------------------------------------------------------------------------------------------------------------------------------------------------------------------------------------------------------------------------------------------------------------------------------------------------|
| Rotterdam CT Score         | The Rotterdam CT Score was published in 2006 and its scoring methodology is based on the findings of TBI patients' admission head CT scans (101). The scoring system takes integer values from 1 to 6 with higher values indicating worse findings (101).                                                                                        |
| Marshall CT Classification | The Marshall Classification was published in 1992 (102). Throughout the literature, it is regarded as a very significant tool for outcome prediction (103). It classifies patients in 6 categories depending on the findings on the initial head CT (103).                                                                                       |
| Stockholm CT Score         | In order to construct the Stockholm CT Score, researchers collected data from 861 head CT scans of TBI patients (104). First, the tSAH score, then the Tally score, and finally the Probability score are calculated for the computation of the Probability for unfavorable outcome (104). During our statistical analysis Tally score was used. |
| Helsinki CT Score          | The Helsinki CT score was created based on data from 869 head CTs of TBI patients in a single retrospective study using logistic regression (105). The scoring system takes integer values from -3 to 14 with higher values indicating worse findings (105).                                                                                     |

## Prognostic models

Large datasets with various prognostic markers and external validation have been used to generate the two primary complex predictive models for TBI, the International Mission for Prognosis and Analysis of Clinical Trials (IMPACT) and the Corticosteroid Randomization After Head Injury (CRASH) (106,107). CRASH is a model that estimates 14-day mortality and 6-month mortality risk and severe disability of adult patients with GCS<15 at admission (107).

---

Table SXVI. GOS.

| Group | Severity            | GOS |
|-------|---------------------|-----|
| 1     | Unfavorable outcome | 1-3 |
| 2     | Favorable outcome   | 4-5 |

The GOS was introduced in 1975. It is a tool for evaluating TBI outcomes (108,109). It categorizes patients on a scale of 1 to 5 depending on their functional state (108,109). During statistical analysis, GOS scores were divided into 2 categories: Unfavorable outcome (1-3), or favorable outcome (4-5). GOS, Glasgow Outcome Scale.

Table SXVII. GOS-E.

| Group | Severity    | GOS-E |
|-------|-------------|-------|
| 1     | Unfavorable | 1-4   |
| 2     | Favorable   | 5-8   |

The GOS-E is a recognized scale for evaluating the disability and level of recovery in TBI patients (108,110) on a scale of 1 to 8. During statistical analysis, GOS-E scores were binarized as follows: Unfavorable outcome [1-4], Favorable outcome [5-8]. GOS-E, Glasgow Outcome Scale-Extended.

## References

1. Greenberg MS, editor. Coma. In: Handbook of Neurosurgery [Internet]. 9th Edition. Thieme Medical Publishers, Inc.; 2019 [cited 2022 Dec 27]. Available from: [https://medone.thieme.com/ebooks/cs\\_9872229#/ebook\\_cs\\_9872229\\_d1e63372](https://medone.thieme.com/ebooks/cs_9872229#/ebook_cs_9872229_d1e63372)
2. Venkatakrishna Rajajee. Management of acute moderate and severe traumatic brain injury. In: Post TW, ed UpToDate Waltham, MA: UpToDate Inc <http://www.uptodate.com> (Accessed on November 14, 2021).
3. Sussman ES, Pendharkar AV, Ho AL, Ghajar J. Mild traumatic brain injury and concussion: terminology and classification. *Handb Clin Neurol*. 2018;158:21–4.
4. Yang SH, Gangidine M, Pritts TA, Goodman MD, Lentsch AB. Interleukin 6 mediates neuroinflammation and motor coordination deficits after mild traumatic brain injury and brief hypoxia in mice. *Shock* Augusta Ga. 2013 Dec;40(6):471–5.
5. Chatzipanteli K, Vitarbo E, Alonso OF, Bramlett HM, Dietrich WD. Temporal profile of cerebrospinal fluid, plasma, and brain interleukin-6 after normothermic fluid-percussion brain injury: effect of secondary hypoxia. *Ther Hypothermia Temp Manag*. 2012 Dec;2(4):167–75.
6. S H, M S, B H, Ac N, Ak S, T M. Delayed cytokine expression in rat brain following experimental contusion. *J Neurosurg* [Internet]. 1997 Mar [cited 2022 Nov 26];86(3). Available from: <https://pubmed.ncbi.nlm.nih.gov/9046307/>
7. Rhodes JKJ, Andrews PJD, Holmes MC, Seckl JR. Expression of interleukin-6 messenger RNA in a rat model of diffuse axonal injury. *Neurosci Lett*. 2002 Dec 19;335(1):1–4.
8. Stover JF, Sakowitz OW, Schöning B, Rupprecht S, Kroppenstedt SN, Thomale UW, et al. Norepinephrine infusion increases interleukin-6 in plasma and cerebrospinal fluid of brain-injured rats. *Med Sci Monit Int Med J Exp Clin Res*. 2003 Oct;9(10):BR382–388.
9. Stover JF, Schöning B, Beyer TF, Woiciechowsky C, Unterberg AW. Temporal profile of cerebrospinal fluid glutamate, interleukin-6, and tumor necrosis factor-alpha in relation to brain edema and contusion following controlled cortical impact injury in rats. *Neurosci Lett*. 2000 Jul 7;288(1):25–8.
10. Gao H, Han Z, Bai R, Huang S, Ge X, Chen F, et al. The accumulation of brain injury leads to severe neuropathological and neurobehavioral changes after repetitive mild traumatic brain injury. *Brain Res*. 2017 Feb 15;1657:1–8.
11. Li Y, Yang Z, Liu B, Valdez C, Chavko M, Cancio LC. Low-Level Primary Blast Induces Neuroinflammation and Neurodegeneration in Rats. *Mil Med*. 2019 Mar 1;184(Suppl 1):265–72.
12. Bai R, Gao H, Han Z, Ge X, Huang S, Chen F, et al. Long-Term Kinetics of Immunologic Components and Neurological Deficits in Rats Following Repetitive Mild Traumatic Brain Injury. *Med Sci Monit Int Med J Exp Clin Res*. 2017 Apr 8;23:1707–18.
13. Jia X, Cong B, Wang S, Dong L, Ma C, Li Y. Secondary damage caused by CD11b+ microglia following diffuse axonal injury in rats. *J Trauma Acute Care Surg*. 2012 Nov;73(5):1168–74.
14. Yang SH, Gustafson J, Gangidine M, Stepien D, Schuster R, Pritts TA, et al. A murine model of mild traumatic brain injury exhibiting cognitive and motor deficits. *J Surg Res*. 2013 Oct;184(2):981–8.
15. Swartz KR, Liu F, Sewell D, Schochet T, Campbell I, Sandor M, et al. Interleukin-6 promotes post-traumatic healing in the central nervous system. *Brain Res*. 2001 Mar 30;896(1–2):86–95.
16. Ley EJ, Clond MA, Singer MB, Shouhed D, Salim A. IL6 deficiency affects function after traumatic brain injury. *J Surg Res*. 2011 Oct;170(2):253–6.
17. Ley EJ, Clond MA, Bukur M, Park R, Chervonski M, Dagliyan G, et al.  $\beta$ -adrenergic receptor inhibition affects cerebral glucose metabolism, motor performance, and inflammatory response after traumatic brain injury. *J Trauma Acute Care Surg*. 2012 Jul;73(1):33–40.
18. Stahel PF, Shohami E, Younis FM, Kariya K, Otto VI, Lenzlinger PM, et al. Experimental closed head injury: analysis of neurological outcome, blood-brain barrier dysfunction, intracranial neutrophil infiltration, and neuronal cell death in mice deficient in genes for pro-inflammatory cytokines. *J Cereb Blood Flow Metab Off J Int Soc Cereb Blood Flow Metab*. 2000 Feb;20(2):369–80.
19. Marklund N, Keck C, Hoover R, Soltesz K, Millard M, LeBold D, et al. Administration of monoclonal antibodies neutralizing the inflammatory mediators tumor necrosis factor alpha and interleukin -6 does not attenuate acute behavioral deficits following experimental traumatic brain injury in the rat. *Restor Neurol Neurosci*. 2005;23(1):31–42.
20. Rodney T, Taylor P, Dunbar K, Perrin N, Lai C, Roy M, et al. High IL-6 in military personnel relates to multiple traumatic brain injuries and post-traumatic stress disorder. *Behav Brain Res*. 2020 Aug 17;392:112715.
21. Bell MJ, Kochanek PM, Doughty LA, Carcillo JA, Adelson PD, Clark RS, et al. Comparison of the interleukin-6 and interleukin-10 response in children after severe traumatic brain injury or septic shock. *Acta Neurochir Suppl*. 1997;70:96–7.
22. Kossmann T, Hans V, Imhof HG, Trentz O, Morganti-Kossmann MC. Interleukin-6 released in human cerebrospinal fluid following traumatic brain injury may trigger nerve growth factor production in astrocytes. *Brain Res*. 1996 Mar 25;713(1–2):143–52.
23. Ondruschka B, Schuch S, Pohlers D, Franke H, Dreßler J. Acute phase response after fatal traumatic brain injury. *Int J Legal Med*. 2018 Mar;132(2):531–9.
24. Thompson HJ, Martha SR, Wang J, Becker KJ. Impact of Age on Plasma Inflammatory Biomarkers in the 6 Months Following Mild Traumatic Brain Injury. *J Head Trauma Rehabil*. 2020;35(5):324–31.
25. Bell MJ, Kochanek PM, Doughty LA, Carcillo JA, Adelson PD, Clark RS, et al. Interleukin-6 and interleukin-10 in cerebrospinal fluid after severe traumatic brain injury in children. *J Neurotrauma*. 1997 Jul;14(7):451–7.
26. Liao Y, Liu P, Guo F, Zhang ZY, Zhang Z. Oxidative burst of circulating neutrophils following traumatic brain injury in human. *PloS One*. 2013;8(7):e68963.

27. Hergenroeder GW, Moore AN, McCoy JP, Samsel L, Ward NH, Clifton GL, et al. Serum IL-6: a candidate biomarker for intracranial pressure elevation following isolated traumatic brain injury. *J Neuroinflammation*. 2010 Mar 11;7:19.
28. Terrell TR, Abramson R, Barth JT, Bennett E, Cantu RC, Sloane R, et al. Genetic polymorphisms associated with the risk of concussion in 1056 college athletes: a multicentre prospective cohort study. *Br J Sports Med*. 2018 Feb;52(3):192–8.
29. Me P, J H, Br H, A J, Cb F, Jr F, et al. Plasma biomarkers associated with deployment trauma and its consequences in post-9/11 era veterans: initial findings from the TRACTS longitudinal cohort. *Transl Psychiatry* [Internet]. 2022 Feb 26 [cited 2022 Nov 26];12(1). Available from: <https://pubmed.ncbi.nlm.nih.gov/35217643/>
30. Gill J, Motamedi V, Osier N, Dell K, Arcurio L, Carr W, et al. Moderate Blast Exposure Results in Increased IL-6 and TNF $\alpha$  in Peripheral Blood. *Brain Behav Immun*. 2017 Oct;65:90–4.
31. Hayakata T, Shiozaki T, Tasaki O, Ikegawa H, Inoue Y, Toshiyuki F, et al. Changes in CSF S100B and cytokine concentrations in early-phase severe traumatic brain injury. *Shock* Augusta Ga. 2004 Aug;22(2):102–7.
32. Ravi P, Nageswaran J, Ramanujam M, Suriyakumar S, Nambi EA. Correlation Between Traumatic Brain Injuries and Callus Formation in Long bone Fractures. *Indian J Orthop*. 2022 May;56(5):837–46.
33. Meier TB, Guedes VA, Smith EG, Sass D, Mithani S, Vorn R, et al. Extracellular vesicle-associated cytokines in sport-related concussion. *Brain Behav Immun*. 2022 Feb;100:83–7.
34. Edwards KA, Gill JM, Pattinson CL, Lai C, Brière M, Rogers NJ, et al. Interleukin-6 is associated with acute concussion in military combat personnel. *BMC Neurol*. 2020 May 25;20(1):209.
35. Berger RP, Ta'asan S, Rand A, Lokshin A, Kochanek P. Multiplex assessment of serum biomarker concentrations in well-appearing children with inflicted traumatic brain injury. *Pediatr Res*. 2009 Jan;65(1):97–102.
36. Yang DB, Yu WH, Dong XQ, Zhang ZY, Du Q, Zhu Q, et al. Serum macrophage migration inhibitory factor concentrations correlate with prognosis of traumatic brain injury. *Clin Chim Acta Int J Clin Chem*. 2017 Jun;469:99–104.
37. Lustenberger T, Kern M, Relja B, Wutzler S, Störmann P, Marzi I. The effect of brain injury on the inflammatory response following severe trauma. *Immunobiology*. 2016 Mar;221(3):427–31.
38. Meier TB, Huber DL, Bohorquez-Montoya L, Nitta ME, Savitz J, Teague TK, et al. A Prospective Study of Acute Blood-Based Biomarkers for Sport-Related Concussion. *Ann Neurol*. 2020 Jun;87(6):907–20.
39. McKeating EG, Andrews PJ, Signorini DF, Mascia L. Transcranial cytokine gradients in patients requiring intensive care after acute brain injury. *Br J Anaesth*. 1997 May;78(5):520–3.
40. He L ming, Qiu B hui, Qi S tao, Fang L xiong, Liu X jun. [Dynamic changes of serum interleukin-6 and interleukin-8 in patients with acute traumatic brain injury and the clinical significance]. *Nan Fang Yi Ke Da Xue Xue Bao*. 2009 Dec;29(5):999–1001.
41. Chiaretti A, Genovese O, Aloe L, Antonelli A, Piastra M, Polidori G, et al. Interleukin 1 $\beta$  and interleukin 6 relationship with paediatric head trauma severity and outcome. *Childs Nerv Syst ChNS Off J Int Soc Pediatr Neurosurg*. 2005 Mar;21(3):185–93; discussion 194.
42. Shore PM, Thomas NJ, Clark RSB, Adelson PD, Wisniewski SR, Janesko KL, et al. Continuous versus intermittent cerebrospinal fluid drainage after severe traumatic brain injury in children: effect on biochemical markers. *J Neurotrauma*. 2004 Sep;21(9):1113–22.
43. Vajtr D, Benada O, Kukacka J, Průša R, Houstava L, Ťoupalík P, et al. Correlation of ultrastructural changes of endothelial cells and astrocytes occurring during blood brain barrier damage after traumatic brain injury with biochemical markers of BBB leakage and inflammatory response. *Physiol Res*. 2009;58(2):263–8.
44. Mellergård P, Åneman O, Sjögren F, Säberg C, Hillman J. Differences in cerebral extracellular response of interleukin-1 $\beta$ , interleukin-6, and interleukin-10 after subarachnoid hemorrhage or severe head trauma in humans. *Neurosurgery*. 2011 Jan;68(1):12–9; discussion 19.
45. Pleines UE, Morganti-Kossmann MC, Rancan M, Joller H, Trentz O, Kossmann T. S-100 beta reflects the extent of injury and outcome, whereas neuronal specific enolase is a better indicator of neuroinflammation in patients with severe traumatic brain injury. *J Neurotrauma*. 2001 May;18(5):491–8.
46. Singhal A, Baker AJ, Hare GMT, Reinders FX, Schlichter LC, Moulton RJ. Association between cerebrospinal fluid interleukin-6 concentrations and outcome after severe human traumatic brain injury. *J Neurotrauma*. 2002 Aug;19(8):929–37.
47. Aisiku IP, Yamal JM, Doshi P, Benoit JS, Gopinath S, Goodman JC, et al. Plasma cytokines IL-6, IL-8, and IL-10 are associated with the development of acute respiratory distress syndrome in patients with severe traumatic brain injury. *Crit Care Lond Engl*. 2016 Sep 15;20:288.
48. Lenski M, Biczok A, Neufischer K, Tonn JC, Briegel J, Thon N. Significance of cerebrospinal fluid inflammatory markers for diagnosing external ventricular drain-associated ventriculitis in patients with severe traumatic brain injury. *Neurosurg Focus*. 2019 Nov 1;47(5):E15.
49. Choudhary A, Varshney R, Kumar A, Kaushik K. A Prospective Study of Novel Therapeutic Targets Interleukin 6, Tumor Necrosis Factor  $\alpha$ , and Interferon  $\gamma$  as Predictive Biomarkers for the Development of Posttraumatic Epilepsy. *World Neurosurg* X. 2021 Oct;12:100107.
50. Woiciechowsky C, Schöning B, Cobanov J, Lanksch WR, Volk HD, Döcke WD. Early IL-6 plasma concentrations correlate with severity of brain injury and pneumonia in brain-injured patients. *J Trauma*. 2002 Feb;52(2):339–45.
51. Chiaretti A, Antonelli A, Riccardi R, Genovese O, Pezzotti P, Di Rocco C, et al. Nerve growth factor expression correlates with severity and outcome of traumatic brain injury in children. *Eur J Paediatr Neurol EJPJN Off J Eur Paediatr Neurol Soc*. 2008 May;12(3):195–204.
52. Davidson J, Cusimano MD, Bendena WG. Post-Traumatic Brain Injury: Genetic Susceptibility to Outcome. *Neurosci Rev J Bringing Neurobiol Neurol Psychiatry*. 2015 Aug;21(4):424–41.

53. Peltz CB, Kenney K, Gill J, Diaz-Arrastia R, Gardner RC, Yaffe K. Blood biomarkers of traumatic brain injury and cognitive impairment in older veterans. *Neurology*. 2020 Sep 1;95(9):e1126–33.
54. Winter CD, Pringle AK, Clough GF, Church MK. Raised parenchymal interleukin-6 levels correlate with improved outcome after traumatic brain injury. *Brain J Neurol*. 2004 Feb;127(Pt 2):315–20.
55. Nwachuku EL, Puccio AM, Adeboye A, Chang YF, Kim J, Okonkwo DO. Time course of cerebrospinal fluid inflammatory biomarkers and relationship to 6-month neurologic outcome in adult severe traumatic brain injury. *Clin Neurol Neurosurg*. 2016 Oct;149:1–5.
56. Feng MJ, Ning WB, Wang W, Lv ZH, Liu XB, Zhu Y, et al. Serum S100A12 as a prognostic biomarker of severe traumatic brain injury. *Clin Chim Acta Int J Clin Chem*. 2018 Dec;480:84–91.
57. Ferreira LCB, Regner A, Miotto KDL, Moura S de, Ikuta N, Vargas AE, et al. Increased levels of interleukin-6, -8 and -10 are associated with fatal outcome following severe traumatic brain injury. *Brain Inj*. 2014;28(10):1311–6.
58. Lewis CT, Savarraj JPJ, McGuire MF, Hergenroeder GW, Alex Choi H, Kitagawa RS. Elevated inflammation and decreased platelet activity is associated with poor outcomes after traumatic brain injury. *J Clin Neurosci Off J Neurosurg Soc Australas*. 2019 Dec;70:37–41.
59. Kumar RG, Diamond ML, Boles JA, Berger RP, Tisherman SA, Kochanek PM, et al. Acute CSF interleukin-6 trajectories after TBI: associations with neuroinflammation, polytrauma, and outcome. *Brain Behav Immun*. 2015 Mar;45:253–62.
60. Raheja A, Sinha S, Samson N, Bhoi S, Subramanian A, Sharma P, et al. Serum biomarkers as predictors of long-term outcome in severe traumatic brain injury: analysis from a randomized placebo-controlled Phase II clinical trial. *J Neurosurg*. 2016 Sep;125(3):631–41.
61. Zwirner J, Bohnert S, Franke H, Garland J, Hammer N, Möbius D, et al. Assessing Protein Biomarkers to Detect Lethal Acute Traumatic Brain Injuries in Cerebrospinal Fluid. *Biomolecules*. 2021 Oct 25;11(11):1577.
62. Di Battista AP, Rhind SG, Richards D, Hutchison MG. An investigation of plasma interleukin-6 in sport-related concussion. *PloS One*. 2020;15(4):e0232053.
63. Park SH, Hwang SK. Prognostic Value of Serum Levels of S100 Calcium-Binding Protein B, Neuron-Specific Enolase, and Interleukin-6 in Pediatric Patients with Traumatic Brain Injury. *World Neurosurg*. 2018 Oct;118:e534–42.
64. Maier B, Schwerdtfeger K, Mautes A, Holanda M, Müller M, Steudel WI, et al. Differential release of interleukines 6, 8, and 10 in cerebrospinal fluid and plasma after traumatic brain injury. *Shock Augusta Ga*. 2001 Jun;15(6):421–6.
65. Crichton A, Ignjatovic V, Babl FE, Oakley E, Greenham M, Hearps S, et al. Interleukin-8 Predicts Fatigue at 12 Months Post-Injury in Children with Traumatic Brain Injury. *J Neurotrauma*. 2021 Apr 15;38(8):1151–63.
66. Rowland B, Savarraj JPJ, Karri J, Zhang X, Cardenas J, Choi HA, et al. Acute Inflammation in Traumatic Brain Injury and Polytrauma Patients Using Network Analysis. *Shock Augusta Ga*. 2020 Jan;53(1):24–34.
67. Chaban V, Clarke GJB, Skandsen T, Islam R, Einarsen CE, Vik A, et al. Systemic Inflammation Persists the First Year after Mild Traumatic Brain Injury: Results from the Prospective Trondheim Mild Traumatic Brain Injury Study. *J Neurotrauma*. 2020 Oct 1;37(19):2120–30.
68. Whalen MJ, Carlos TM, Kochanek PM, Wisniewski SR, Bell MJ, Clark RS, et al. Interleukin-8 is increased in cerebrospinal fluid of children with severe head injury. *Crit Care Med*. 2000 Apr;28(4):929–34.
69. Stein DM, Lindel AL, Murdock KR, Kufera JA, Menaker J, Scalea TM. Use of serum biomarkers to predict secondary insults following severe traumatic brain injury. *Shock Augusta Ga*. 2012 Jun;37(6):563–8.
70. Kossmann T, Stahel PF, Lenzlinger PM, Redl H, Dubs RW, Trentz O, et al. Interleukin-8 released into the cerebrospinal fluid after brain injury is associated with blood-brain barrier dysfunction and nerve growth factor production. *J Cereb Blood Flow Metab Off J Int Soc Cereb Blood Flow Metab*. 1997 Mar;17(3):280–9.
71. Mussack T, Biberthaler P, Kanz KG, Wiedemann E, Gippner-Steppert C, Mutschler W, et al. Serum S-100B and interleukin-8 as predictive markers for comparative neurologic outcome analysis of patients after cardiac arrest and severe traumatic brain injury. *Crit Care Med*. 2002 Dec;30(12):2669–74.
72. Gopcevic A, Mazul-Sunko B, Marout J, Sekulic A, Antoljak N, Siranovic M, et al. Plasma interleukin-8 as a potential predictor of mortality in adult patients with severe traumatic brain injury. *Tohoku J Exp Med*. 2007 Apr;211(4):387–93.
73. Yang B, Sun X, Shi Q, Dan W, Zhan Y, Zheng D, et al. Prediction of early prognosis after traumatic brain injury by multifactor model. *CNS Neurosci Ther*. 2022 Dec;28(12):2044–52.
74. Kushi H, Saito T, Makino K, Hayashi N. IL-8 is a key mediator of neuroinflammation in severe traumatic brain injuries. *Acta Neurochir Suppl*. 2003;86:347–50.
75. Polat Ö, Uçkun ÖM, Tuncer C, Belen AD. Is IL-8 level an indicator of clinical and radiological status of traumatic brain injury? *Ulus Travma Ve Acil Cerrahi Derg Turk J Trauma Emerg Surg TJTES*. 2019 Mar;25(2):193–7.
76. Perez-Barcena J, Ibáñez J, Brell M, Crespí C, Frontera G, Llompарт-Pou JA, et al. Lack of correlation among intracerebral cytokines, intracranial pressure, and brain tissue oxygenation in patients with traumatic brain injury and diffuse lesions. *Crit Care Med*. 2011 Mar;39(3):533–40.
77. Rhodes J, Sharkey J, Andrews P. Serum IL-8 and MCP-1 concentration do not identify patients with enlarging contusions after traumatic brain injury. *J Trauma*. 2009 Jun;66(6):1591–7; discussion 1598.
78. Kamm K, Vanderkolk W, Lawrence C, Jonker M, Davis AT. The effect of traumatic brain injury upon the concentration and expression of interleukin-1beta and interleukin-10 in the rat. *J Trauma*. 2006 Jan;60(1):152–7.
79. Peruzzaro ST, Andrews MMM, Al-Gharaibeh A, Pupiec O, Resk M, Story D, et al. Transplantation of mesenchymal stem cells genetically engineered to overexpress interleukin-10 promotes alternative inflammatory response in rat model of traumatic brain injury. *J Neuroinflammation*. 2019 Jan 5;16(1):2.

80. Maiti P, Peruzzaro S, Kolli N, Andrews M, Al-Gharaibeh A, Rossignol J, et al. Transplantation of mesenchymal stem cells overexpressing interleukin-10 induces autophagy response and promotes neuroprotection in a rat model of TBI. *J Cell Mol Med*. 2019 Aug;23(8):5211–24.
81. Zhou L, Lin J, Lin J, Kui G, Zhang J, Yu Y. Neuroprotective effects of vagus nerve stimulation on traumatic brain injury. *Neural Regen Res*. 2014 Sep 1;9(17):1585–91.
82. Knoblach SM, Faden AI. Interleukin-10 improves outcome and alters proinflammatory cytokine expression after experimental traumatic brain injury. *Exp Neurol*. 1998 Sep;153(1):143–51.
83. Maegele M, Sauerland S, Bouillon B, Schäfer U, Trübel H, Riess P, et al. Differential immunoresponses following experimental traumatic brain injury, bone fracture and “two-hit”-combined neurotrauma. *Inflamm Res Off J Eur Histamine Res Soc Al*. 2007 Aug;56(8):318–23.
84. Lagerstedt L, Egea-Guerrero JJ, Bustamante A, Rodríguez-Rodríguez A, El Rahal A, Quintana-Díaz M, et al. Combining H-FABP and GFAP increases the capacity to differentiate between CT-positive and CT-negative patients with mild traumatic brain injury. *PloS One*. 2018;13(7):e0200394.
85. Csuka E, Morganti-Kossmann MC, Lenzlinger PM, Joller H, Trentz O, Kossmann T. IL-10 levels in cerebrospinal fluid and serum of patients with severe traumatic brain injury: relationship to IL-6, TNF-alpha, TGF-beta1 and blood-brain barrier function. *J Neuroimmunol*. 1999 Nov 15;101(2):211–21.
86. Lagerstedt L, Egea-Guerrero JJ, Rodríguez-Rodríguez A, Bustamante A, Montaner J, El Rahal A, et al. Early measurement of interleukin-10 predicts the absence of CT scan lesions in mild traumatic brain injury. *PloS One*. 2018;13(2):e0193278.
87. Shiozaki T, Hayakata T, Tasaki O, Hosotubo H, Fujita K, Mouri T, et al. Cerebrospinal fluid concentrations of anti-inflammatory mediators in early-phase severe traumatic brain injury. *Shock Augusta Ga*. 2005 Dec;23(5):406–10.
88. Lagerstedt L, Azurmendi L, Tenovuo O, Katila AJ, Takala RSK, Blennow K, et al. Interleukin 10 and Heart Fatty Acid-Binding Protein as Early Outcome Predictors in Patients With Traumatic Brain Injury. *Front Neurol*. 2020;11:376.
89. Posti JP, Takala RSK, Raj R, Luoto TM, Azurmendi L, Lagerstedt L, et al. Admission Levels of Interleukin 10 and Amyloid  $\beta$  1-40 Improve the Outcome Prediction Performance of the Helsinki Computed Tomography Score in Traumatic Brain Injury. *Front Neurol*. 2020;11:549527.
90. Vedantam A, Brennan J, Levin HS, McCarthy JJ, Dash PK, Redell JB, et al. Early versus Late Profiles of Inflammatory Cytokines after Mild Traumatic Brain Injury and Their Association with Neuropsychological Outcomes. *J Neurotrauma*. 2021 Jan 1;38(1):53–62.
91. Schneider Soares FM, Menezes de Souza N, Libório Schwarzbald M, Paim Diaz A, Costa Nunes J, Hohl A, et al. Interleukin-10 is an independent biomarker of severe traumatic brain injury prognosis. *Neuroimmunomodulation*. 2012;19(6):377–85.
92. Kirchhoff C, Buhmann S, Bogner V, Stegmaier J, Leidel BA, Braunstein V, et al. Cerebrospinal IL-10 concentration is elevated in non-survivors as compared to survivors after severe traumatic brain injury. *Eur J Med Res*. 2008 Oct 27;13(10):464–8.
93. Koivikko P, Posti JP, Mohammadian M, Lagerstedt L, Azurmendi L, Hossain I, et al. Potential of heart fatty-acid binding protein, neurofilament light, interleukin-10 and S100 calcium-binding protein B in the acute diagnostics and severity assessment of traumatic brain injury. *Emerg Med J EMJ*. 2022 Mar;39(3):206–12.
94. Müller M, Schwerdtfeger K, Maier B, Mautes A, Schiedat T, Bianchi O, et al. Cerebral blood flow velocity and inflammatory response after severe traumatic brain injury. *Eur J Ultrasound Off J Eur Fed Soc Ultrasound Med Biol*. 2001 Mar;12(3):203–8.
95. Timmermann C. ‘Just give me the best quality of life questionnaire’: the Karnofsky scale and the history of quality of life measurements in cancer trials. *Chronic Illn*. 2013 Sep;9(3):179–90.
96. Broderick JP, Adeoye O, Elm J. Evolution of the Modified Rankin Scale and Its Use in Future Stroke Trials. *Stroke*. 2017 Jul;48(7):2007–12.
97. Oken MM, Creech RH, Tormey DC, Horton J, Davis TE, McFadden ET, et al. Toxicity and response criteria of the Eastern Cooperative Oncology Group. *Am J Clin Oncol*. 1982 Dec;5(6):649–55.
98. Baker SP, O’Neill B, Haddon W, Long WB. The injury severity score: a method for describing patients with multiple injuries and evaluating emergency care. *J Trauma*. 1974 Mar;14(3):187–96.
99. Linn S. The injury severity score—importance and uses. *Ann Epidemiol*. 1995 Nov;5(6):440–6.
100. Greenberg M. Outcome from head trauma. In: *Handbook of Neurosurgery*. 9th Edition. New York: Thieme; 2019.
101. Maas AIR, Hukkelhoven CWPM, Marshall LF, Steyerberg EW. Prediction of outcome in traumatic brain injury with computed tomographic characteristics: a comparison between the computed tomographic classification and combinations of computed tomographic predictors. *Neurosurgery*. 2005 Dec;57(6):1173–82; discussion 1173–1182.
102. Marshall LF, Marshall SB, Klauber MR, Clark M van B, Eisenberg HM, Jane JA, et al. A new classification of head injury based on computerized tomography. *J Neurosurg*. 1991 Nov 1;75(Supplement):S14–20.
103. Thelin EP, Nelson DW, Vehviläinen J, Nyström H, Kivisaari R, Siironen J, et al. Evaluation of novel computerized tomography scoring systems in human traumatic brain injury: An observational, multicenter study. *PLoS Med*. 2017 Aug 3;14(8):e1002368.
104. Nelson DW, Nyström H, MacCallum RM, Thornquist B, Lilja A, Bellander BM, et al. Extended analysis of early computed tomography scans of traumatic brain injured patients and relations to outcome. *J Neurotrauma*. 2010 Jan;27(1):51–64.
105. Raj R, Siironen J, Skrifvars MB, Hernesniemi J, Kivisaari R. Predicting outcome in traumatic brain injury: development of a novel computerized tomography classification system (Helsinki computerized tomography score). *Neurosurgery*. 2014 Dec;75(6):632–46; discussion 646–647.
106. Prognostic calculator | TBI-IMPACT.org [Internet]. [cited 2022 Dec 4]. Available from: <http://www.tbi-impact.org/?p=impact/calc>

107. MRC CRASH Trial Collaborators, Perel P, Arango M, Clayton T, Edwards P, Komolafe E, et al. Predicting outcome after traumatic brain injury: practical prognostic models based on large cohort of international patients. *BMJ*. 2008 Feb 23;336(7641):425–9.
108. Wilson L, Boase K, Nelson LD, Temkin NR, Giacino JT, Markowitz AJ, et al. A Manual for the Glasgow Outcome Scale-Extended Interview. *J Neurotrauma*. 2021 Sep 1;38(17):2435–46.
109. Jennett B, Bond M. Assessment of outcome after severe brain damage. *Lancet Lond Engl*. 1975 Mar 1;1(7905):480–4.
110. Wilson JT, Pettigrew LE, Teasdale GM. Structured interviews for the Glasgow Outcome Scale and the extended Glasgow Outcome Scale: guidelines for their use. *J Neurotrauma*. 1998 Aug;15(8):573–85.
